# Supplementary material
Source: HighWire-hosted journal article supplement (https://jitc.bmj.com/content/9/6/e002488)

**Figure S3**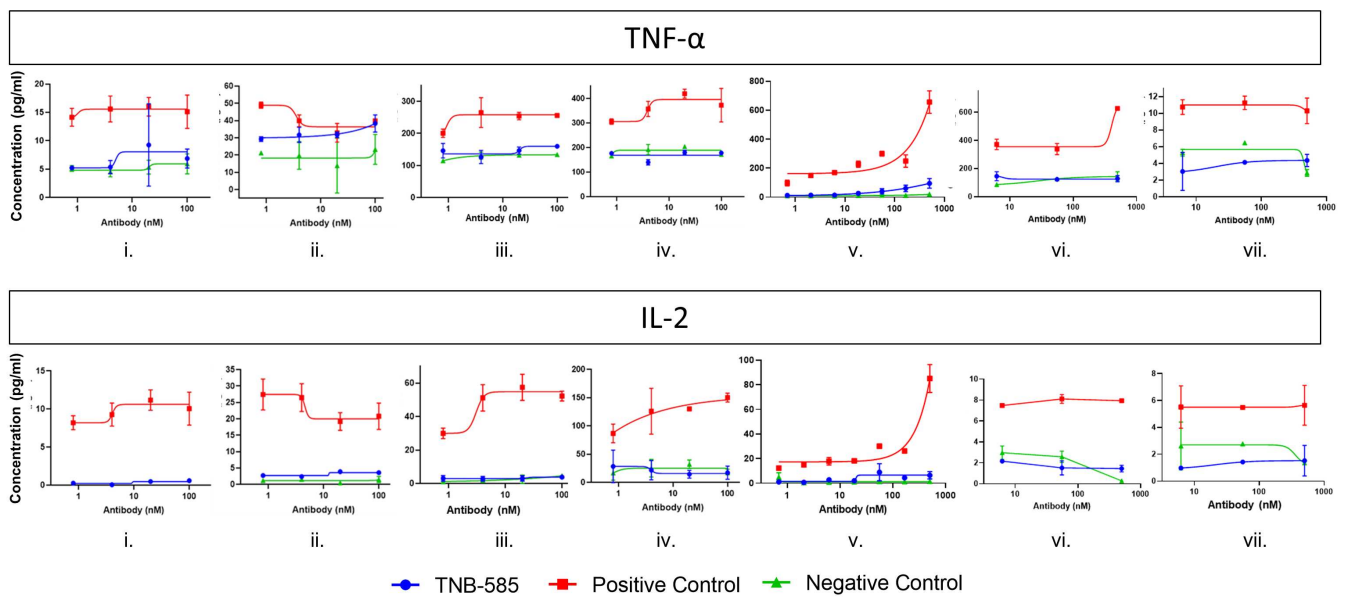

Supplement: inline-supplementary-material-3 [file inline-supplementary-material-3.pdf]

**Figure S4**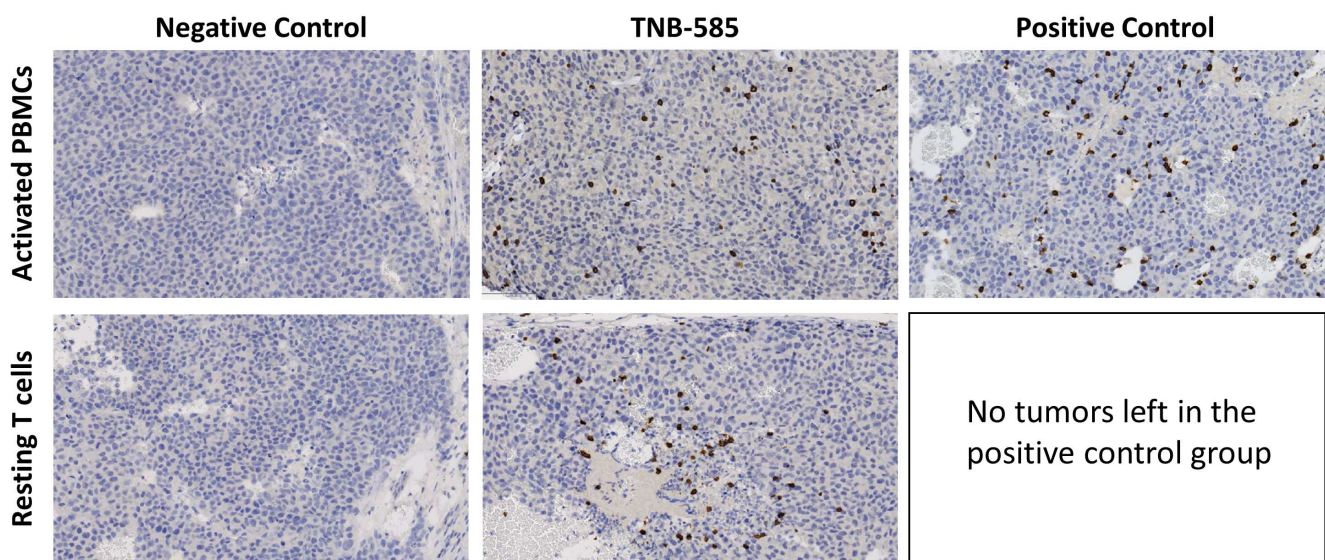

Supplement: inline-supplementary-material-4 [file inline-supplementary-material-4.pdf]

**Figure S1**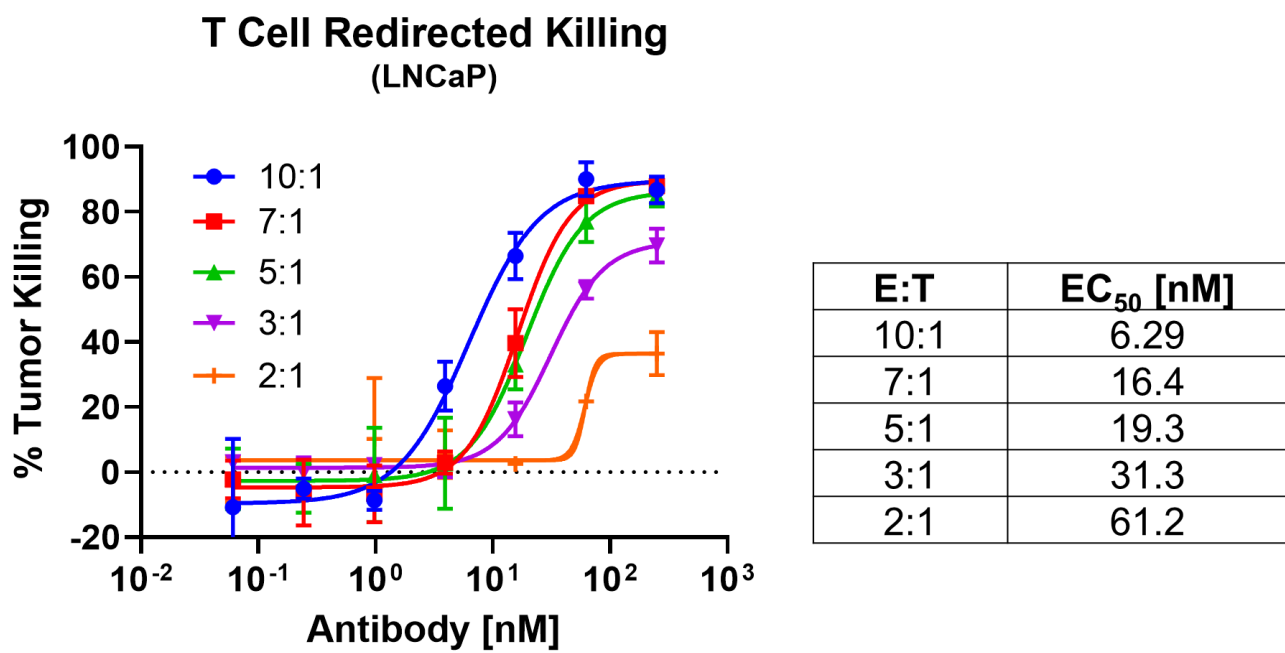

Supplement: inline-supplementary-material-5 [file inline-supplementary-material-5.pdf]
